# Supplementary material
Source: Springer Nature journal article supplement (https://www.springermedizin.de/resource/supplementary/13045_2011_181_MOESM1_ESM.pdf/9660820)

# ANC Response Pre- and Post-Ezatiostat Treatment

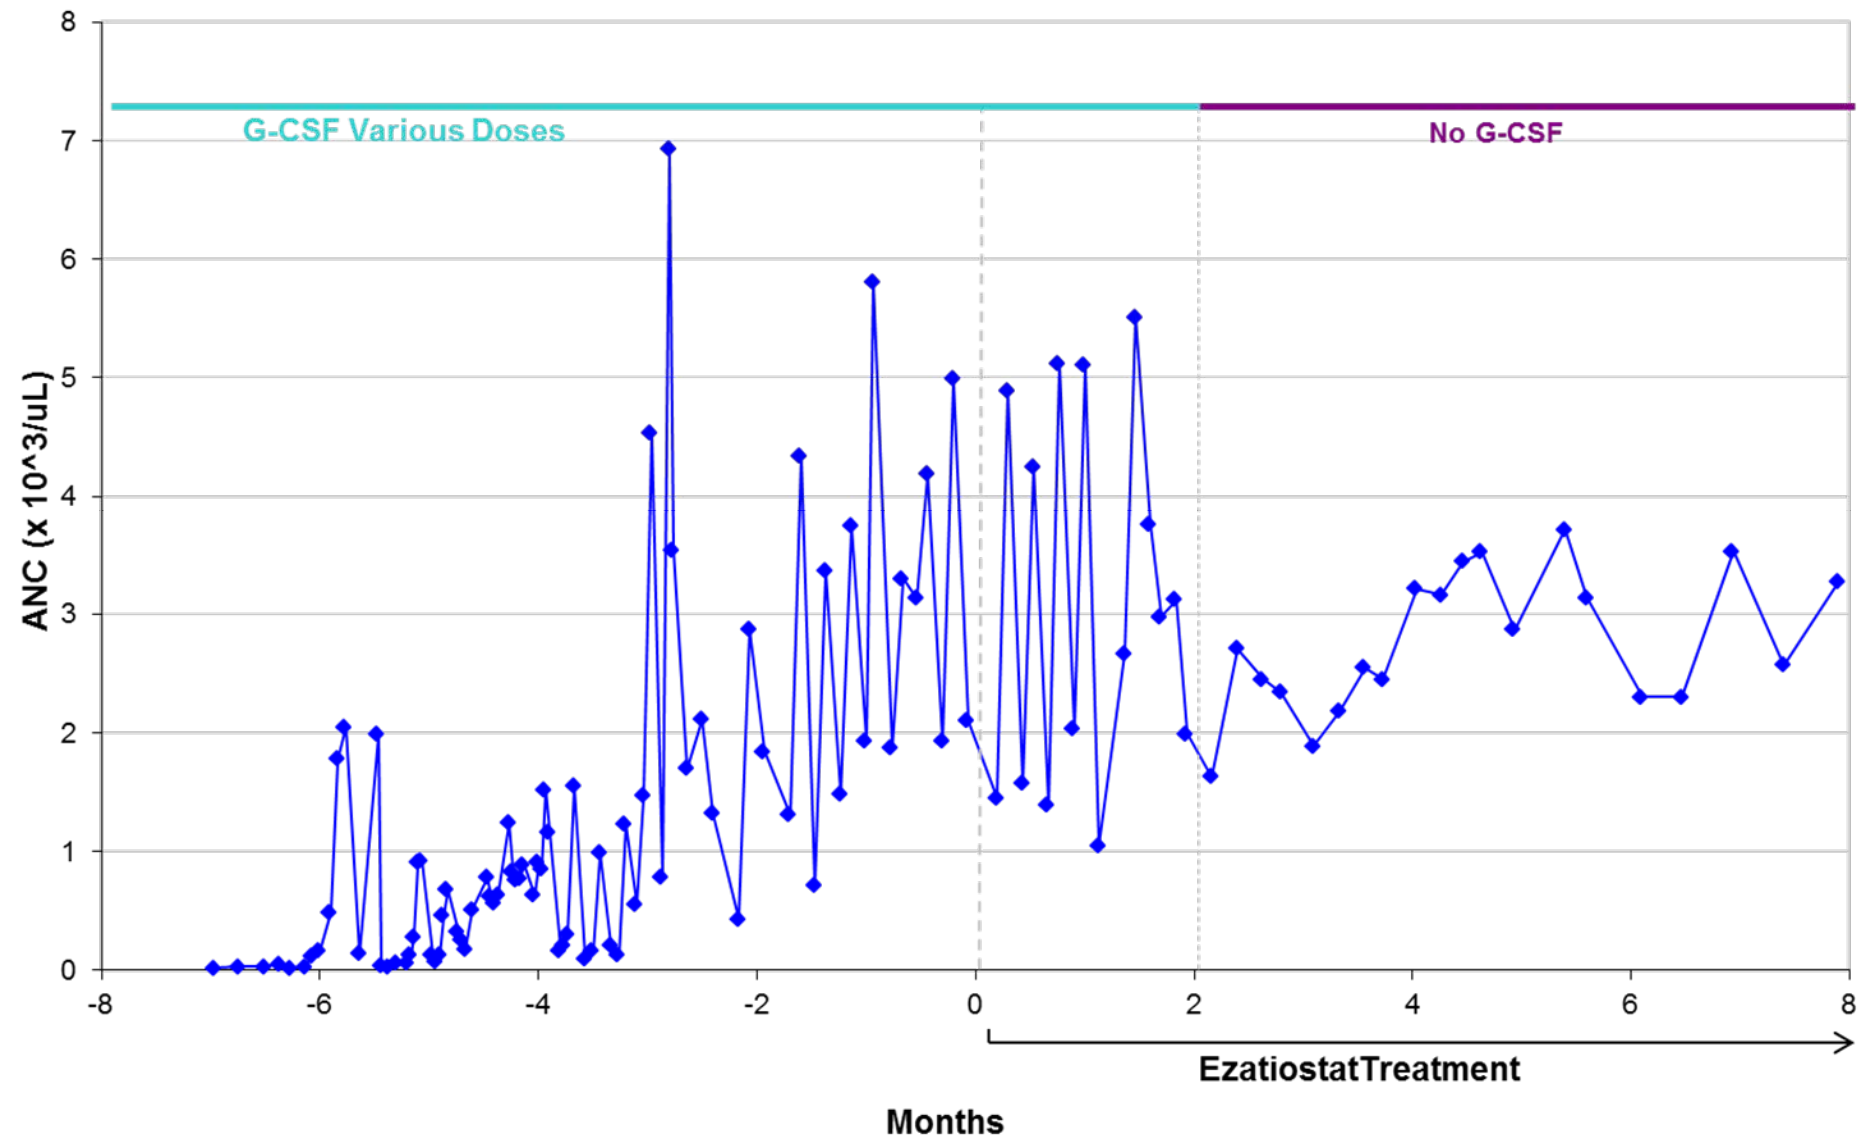

Supplement: MOESM1 [file 9660820]
